# Supplementary material for: Highly active copper-N-heterocyclic carbene catalysts for the synthesis of phenols
Source: Royal Society of Chemistry journal article supplement (doi:10.1039/c2ra22193d), 2012-01-01
Supplement: c2ra22193d.pdf [file c2ra22193d.pdf]

*Supporting Information for*

# Highly Active Copper-N-Heterocyclic Carbene Catalysts for the Synthesis of Phenols

Olivier Songis, Pierre Boulens, Callum G. M. Benson and Catherine S. J. Cazin\*

*EaStCHEM School of Chemistry, University of St Andrews, St Andrews, KY16 9ST, UK.*

*Fax: (+)44 (0) 1334 463 808*

*E-mail: cc111@st-andrews.ac.uk*

## Contents

|                                                                                                   |            |
|---------------------------------------------------------------------------------------------------|------------|
| <i>General information</i> _____                                                                  | <i>S2</i>  |
| <i>Catalysis</i> _____                                                                            | <i>S2</i>  |
| Procedure for Table 1 _____                                                                       | <i>S2</i>  |
| Procedure for Table 2 _____                                                                       | <i>S2</i>  |
| <i>Hydroxylation products</i> _____                                                               | <i>S3</i>  |
| Phenol (Table 2, Entry 1) <sup>2</sup> _____                                                      | <i>S3</i>  |
| <i>p</i> -Cresol (Table 2, Entry 2) <sup>2</sup> _____                                            | <i>S3</i>  |
| <i>o</i> -Cresol (Table 2, Entry 3) <sup>3</sup> _____                                            | <i>S3</i>  |
| <i>p</i> -Hydroxyanisole (Table 2, Entry 4) <sup>2</sup> _____                                    | <i>S4</i>  |
| <i>p</i> -Nitrophenol (Table 2, Entry 5) <sup>2</sup> _____                                       | <i>S4</i>  |
| <i>p</i> -Hydroxyacetophenone (Table 2, Entry 6) <sup>2</sup> _____                               | <i>S4</i>  |
| 2-Hydroxybenzylalcohol (Table 2, Entry 7) <sup>4</sup> _____                                      | <i>S5</i>  |
| <i><sup>1</sup>H and <sup>13</sup>C-<sup>1</sup>H NMR spectra of hydroxylation products</i> _____ | <i>S6</i>  |
| Phenol (Table 2, Entry 1) <sup>2</sup> _____                                                      | <i>S6</i>  |
| <i>p</i> -Cresol (Table 2, Entry 2) <sup>2</sup> _____                                            | <i>S7</i>  |
| <i>o</i> -Cresol (Table 2, Entry 3) <sup>3</sup> _____                                            | <i>S8</i>  |
| <i>p</i> -Hydroxyanisole (Table 2, Entry 4) <sup>2</sup> _____                                    | <i>S9</i>  |
| <i>p</i> -Nitrophenol (Table 2, Entry 5) <sup>2</sup> _____                                       | <i>S10</i> |
| <i>p</i> -Hydroxyacetophenone (Table 2, Entry 6) <sup>2</sup> _____                               | <i>S11</i> |
| <i>o</i> -Hydroxybenzylalcohol (Table 2, Entry 7) <sup>4</sup> _____                              | <i>S12</i> |
| <i>References</i> _____                                                                           | <i>S13</i> |

## General information

All reactions were performed under inert atmosphere using standard Schlenk line and glovebox techniques. Solvents were dispensed from a solvent purification system. All other reagents were used without further purification.  $^1\text{H}$  and  $^{13}\text{C}\{-^1\text{H}\}$  Nuclear Magnetic Resonance (NMR) spectra were recorded on a Bruker AVANCE 400 spectrometer using the residual solvent peak as reference ( $\text{CHCl}_3$ :  $\delta_{\text{H}} = 7.26$  ppm,  $\delta_{\text{C}} = 77.16$  ppm) at 298K. Elemental analyses were performed by the London Metropolitan University Service. All complexes of the type  $[\text{CuCl}(\text{NHC})]$  were prepared by reaction of  $\text{Cu}_2\text{O}$  with the corresponding imidazolium chloride.<sup>1</sup> All these complexes was analysed by NMR and their purity was ascertained by elemental analysis (CHN). All other compounds were purchased and used as received.

## Catalysis

### *Procedure for Table 1*

A vial was charged with a stirring bar, iodobenzene (204.1 mg, 1 mmol) and the base (3 mmol). The vial was flushed with argon and a solution of the catalyst (250  $\mu\text{L}$ , 0.01-0.05 mol% from a stock solution of **1-4** dissolved in 2 mL of DMSO) was added. 250  $\mu\text{L}$  of DMSO and 500  $\mu\text{L}$  of water were finally added and the mixture was stirred at 130°C for 24 hours. The reaction mixture was then allowed to cool to room temperature, acidified with aqueous HCl (50 mL, HCl 0.1N), and extracted with dichloromethane (3x50 mL). The organic extracts were combined, dried with  $\text{MgSO}_4$  and concentrated under reduced pressure. The conversion was determined by gas chromatography.

### *Procedure for Table 2*

A vial was charged with a stirring bar, the substrate (1 mmol) and caesium hydroxide (488.6 mg, 3 mmol). The vial was flushed with argon and a solution of  $[\text{CuCl}(\text{SIPr})]$  (**4**) (250  $\mu\text{L}$ , from a stock solution of catalyst **4** dissolved in 2 mL of DMSO) was added. 250  $\mu\text{L}$  of DMSO and 500  $\mu\text{L}$  of water were finally added and the mixture was stirred at the appropriate temperature for 24 hours. The reaction mixture was then allowed to cool to room temperature, acidified with dilute aqueous HCl (50 mL, HCl 0.1N), and extracted with dichloromethane (3x50 mL). The organic extracts were combined, dried with  $\text{MgSO}_4$  and concentrated under reduced pressure. The crude material was purified column chromatography ( $\text{SiO}_2$ ).

## Hydroxylation products

### *Phenol (Table 2, Entry 1)*<sup>2</sup>

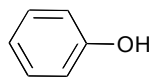

Eluent: C<sub>5</sub>H<sub>10</sub>/EtOAc (8/2).

Title compound obtained as a colourless solid (88%).

**<sup>1</sup>H NMR (CDCl<sub>3</sub>, 400 MHz):** δ (ppm) = 5.80 (br s, 1H, OH), 6.83 (d, *J* = 8.0 Hz, 2H, CH), 6.92 (m, 1H, CH), 7.23 (m, 2H, CH).

**<sup>13</sup>C{<sup>1</sup>H} NMR (CDCl<sub>3</sub>, 100 MHz):** δ (ppm) = 115.5, 121.0, 129.8, 155.4.

### *p-Cresol (Table 2, Entry 2)*<sup>2</sup>

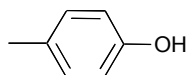

Eluent C<sub>5</sub>H<sub>10</sub>/EtOAc (8/2).

Title compound obtained as a colourless solid (82%).

**<sup>1</sup>H NMR (CDCl<sub>3</sub>, 400 MHz):** δ (ppm) = 2.22 (s, 3H, CH<sub>3</sub>), 5.91 (br s, 1H, OH), 6.69 (d, *J* = 8.0 Hz, 2H, CH), 6.96 (d, *J* = 8.0 Hz, 2H, CH).

**<sup>13</sup>C{<sup>1</sup>H} NMR (CDCl<sub>3</sub>, 100 MHz):** δ (ppm) = 20.5, 115.2, 130.1, 130.2, 153.2.

### *o-Cresol (Table 2, Entry 3)*<sup>3</sup>

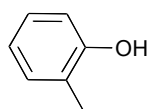

Eluent C<sub>5</sub>H<sub>10</sub>/EtOAc (7/3).

Title compound obtained as colourless oil (91%).

**<sup>1</sup>H NMR (CDCl<sub>3</sub>, 400 MHz):** δ (ppm) = 2.28 (s, 3H, CH<sub>3</sub>), 5.16 (br s, 1H, OH), 6.78 (d, *J* = 8.0 Hz, 1H, CH), 6.87 (t, *J* = 8.0 Hz, 1H, CH), 7.08-7.16 (m, 2H, CH).

**<sup>13</sup>C{<sup>1</sup>H} NMR (CDCl<sub>3</sub>, 100 MHz):** δ (ppm) = 15.8, 115.0, 120.8, 124.0, 127.19, 131.15, 153.8.

***p*-Hydroxyanisole (Table 2, Entry 4)<sup>2</sup>**

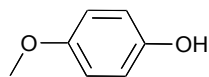

Eluent C<sub>5</sub>H<sub>10</sub>/EtOAc (7/3).

Title compound obtained as a colourless solid (92%).

<sup>1</sup>H NMR (CDCl<sub>3</sub>, 400 MHz): δ (ppm) = 3.77 (s, 3H, CH<sub>3</sub>), 5.33 (br s, 1H, OH), 6.75-6.81 (m, 4H, CH).

<sup>13</sup>C{<sup>1</sup>H} NMR (CDCl<sub>3</sub>, 100 MHz): δ (ppm) = 56.0, 115.0, 116.2, 149.6, 153.7.

***p*-Nitrophenol (Table 2, Entry 5)<sup>2</sup>**

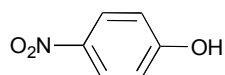

Eluent C<sub>5</sub>H<sub>10</sub>/EtOAc (5/5).

Title compound obtained as a yellow solid (80%).

<sup>1</sup>H NMR (CDCl<sub>3</sub>, 400 MHz): δ (ppm) = 6.37 (br s, 1H, OH), 6.93 (d, *J* = 9.0 Hz, 2H, CH), 8.17 (d, *J* = 9.0 Hz, 2H, CH).

<sup>13</sup>C{<sup>1</sup>H} NMR (CDCl<sub>3</sub>, 100 MHz): δ (ppm) = 115.8, 126.4, 161.7.

***p*-Hydroxyacetophenone (Table 2, Entry 6)<sup>2</sup>**

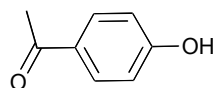

Eluent C<sub>5</sub>H<sub>10</sub>/EtOAc (8/2).

Title compound obtained as a yellow solid (63%).

<sup>1</sup>H NMR (CDCl<sub>3</sub>, 400 MHz): δ (ppm) = 2.59 (s, 3H, CH<sub>3</sub>), 6.94 (d, *J* = 9.0 Hz, 2H, CH), 7.69 (br s, 1H, OH), 7.90 (d, *J* = 9.0 Hz, 2H, CH).

<sup>13</sup>C{<sup>1</sup>H} NMR (CDCl<sub>3</sub>, 100 MHz): δ (ppm) = 26.4, 115.7, 129.7, 131.4, 161.5, 198.7.

**2-Hydroxybenzylalcohol (Table 2, Entry 7)<sup>4</sup>**

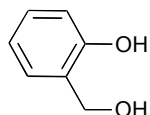

Eluent C<sub>5</sub>H<sub>10</sub>/EtOAc (6/4).

Title compound obtained as a yellow solid (58%).

**<sup>1</sup>H NMR (CDCl<sub>3</sub>, 400 MHz):**  $\delta$  (ppm) = 4.83 (s, 2H, CH<sub>2</sub>), 6.85 (t,  $J$  = 8.0 Hz, 1H, CH), 6.87 (d,  $J$  = 7.5 Hz, 1H, CH), 7.03 (d,  $J$  = 7.5 Hz, 1H, CH), 7.2 (t,  $J$  = 7.5 Hz, 1H, CH).

**<sup>13</sup>C{<sup>1</sup>H} NMR (CDCl<sub>3</sub>, 100 MHz):**  $\delta$  (ppm) = 64.6, 116.6, 120.3, 124.9, 128.1, 129.6, 156.0.

## $^1\text{H}$ and $^{13}\text{C}\{-^1\text{H}\}$ NMR spectra of hydroxylation products

### Phenol (Table 2, Entry 1)<sup>2</sup>

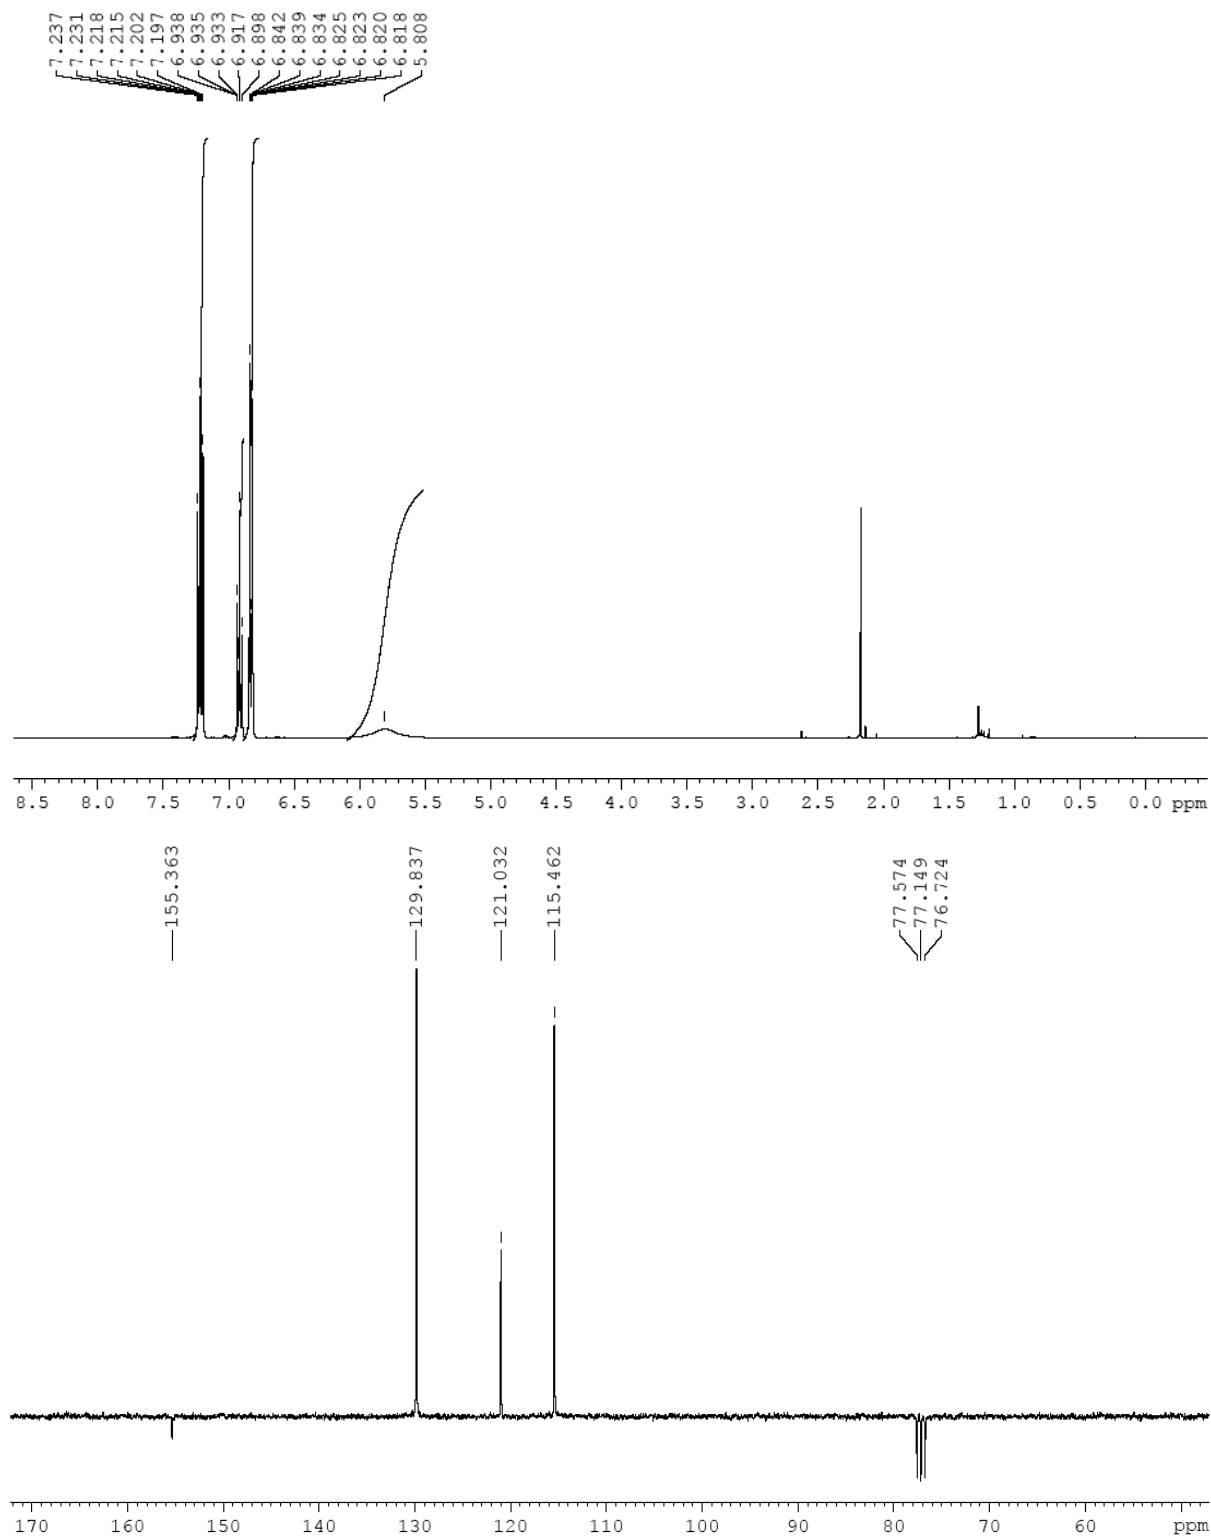

### *p*-Cresol (Table 2, Entry 2)<sup>2</sup>

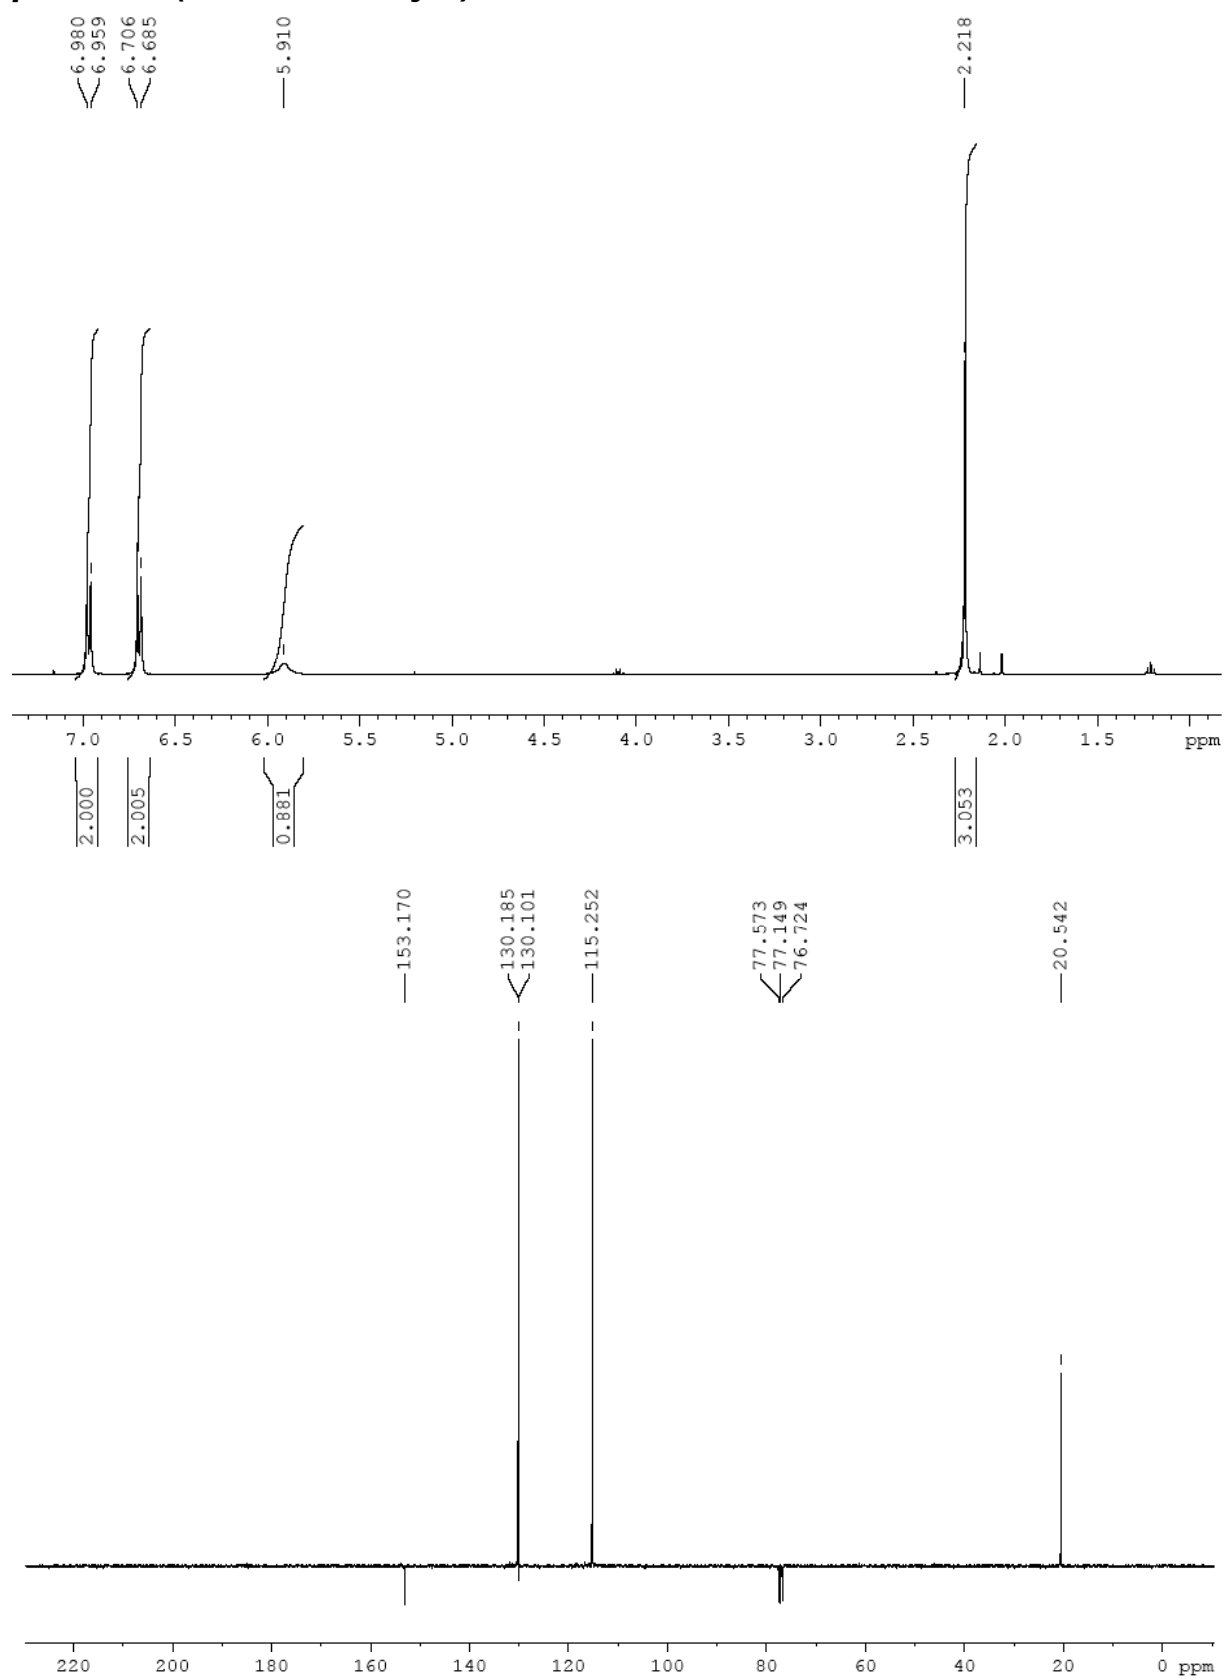

***o*-Cresol (Table 2, Entry 3)<sup>3</sup>**

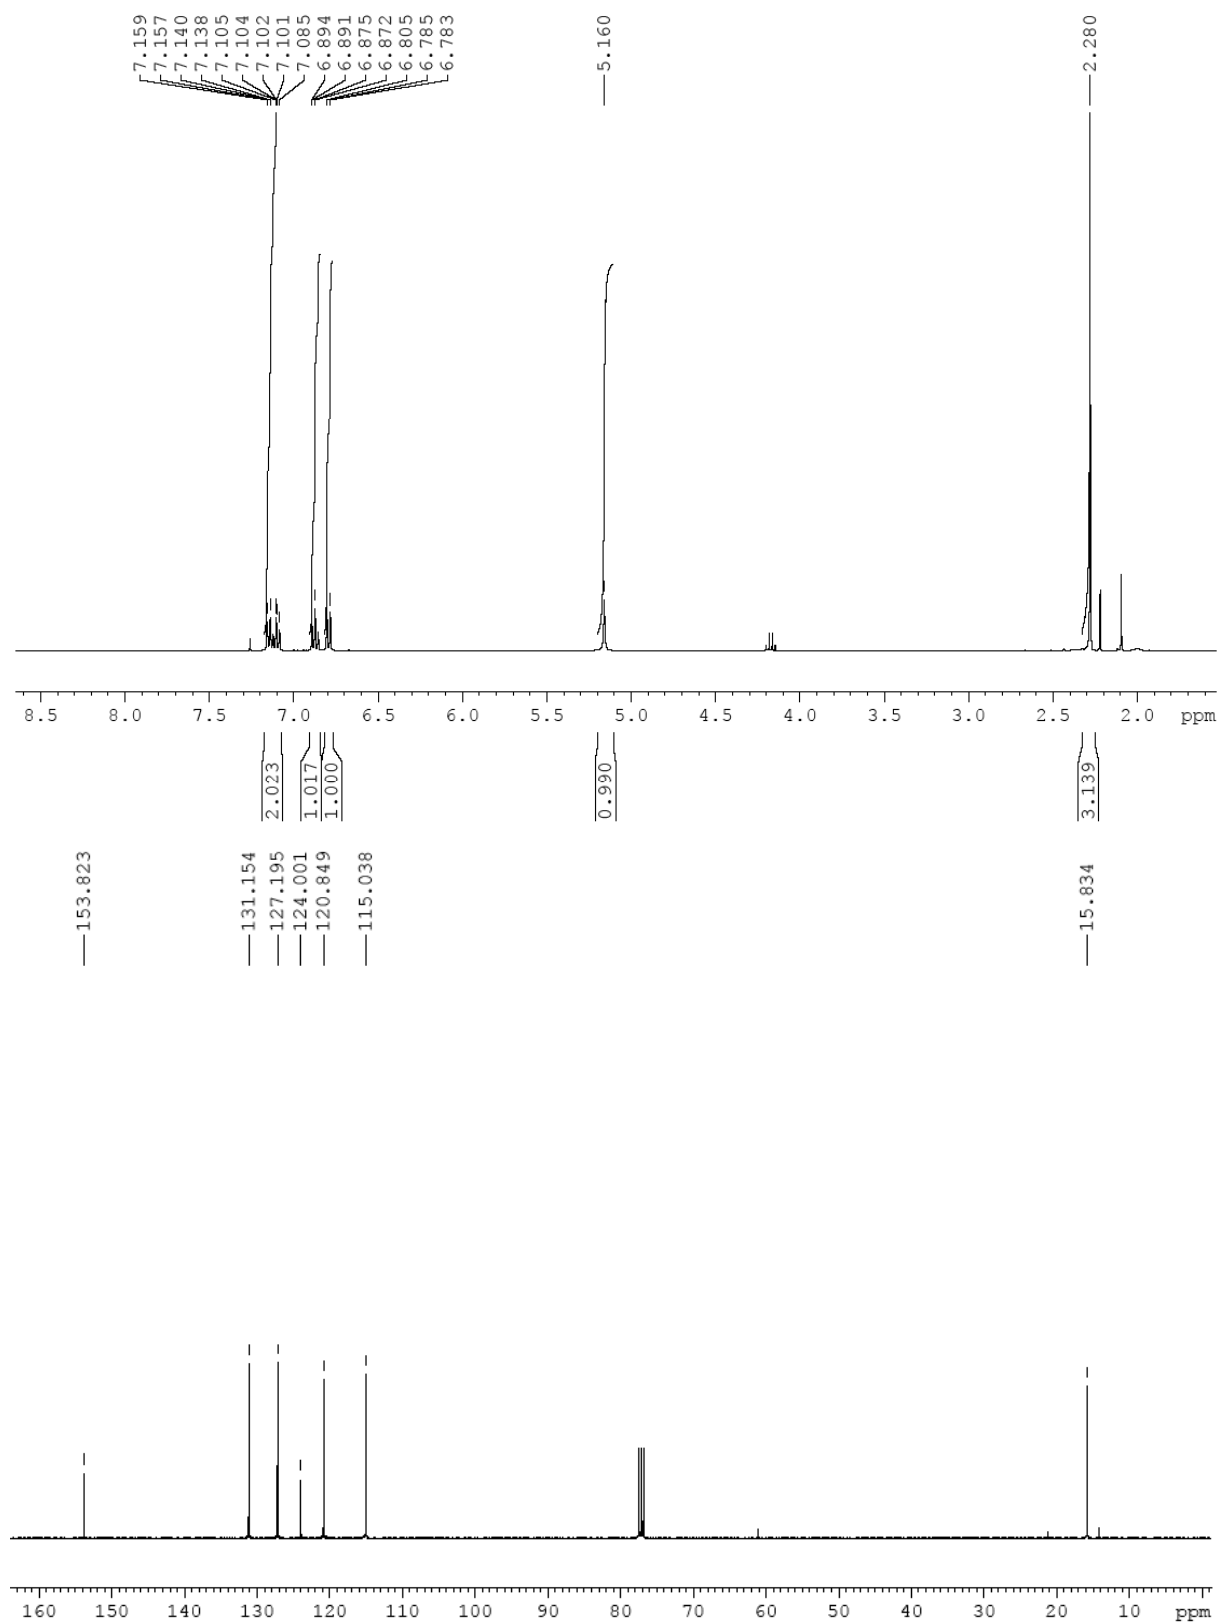



***p*-Hydroxyanisole (Table 2, Entry 4)<sup>2</sup>**

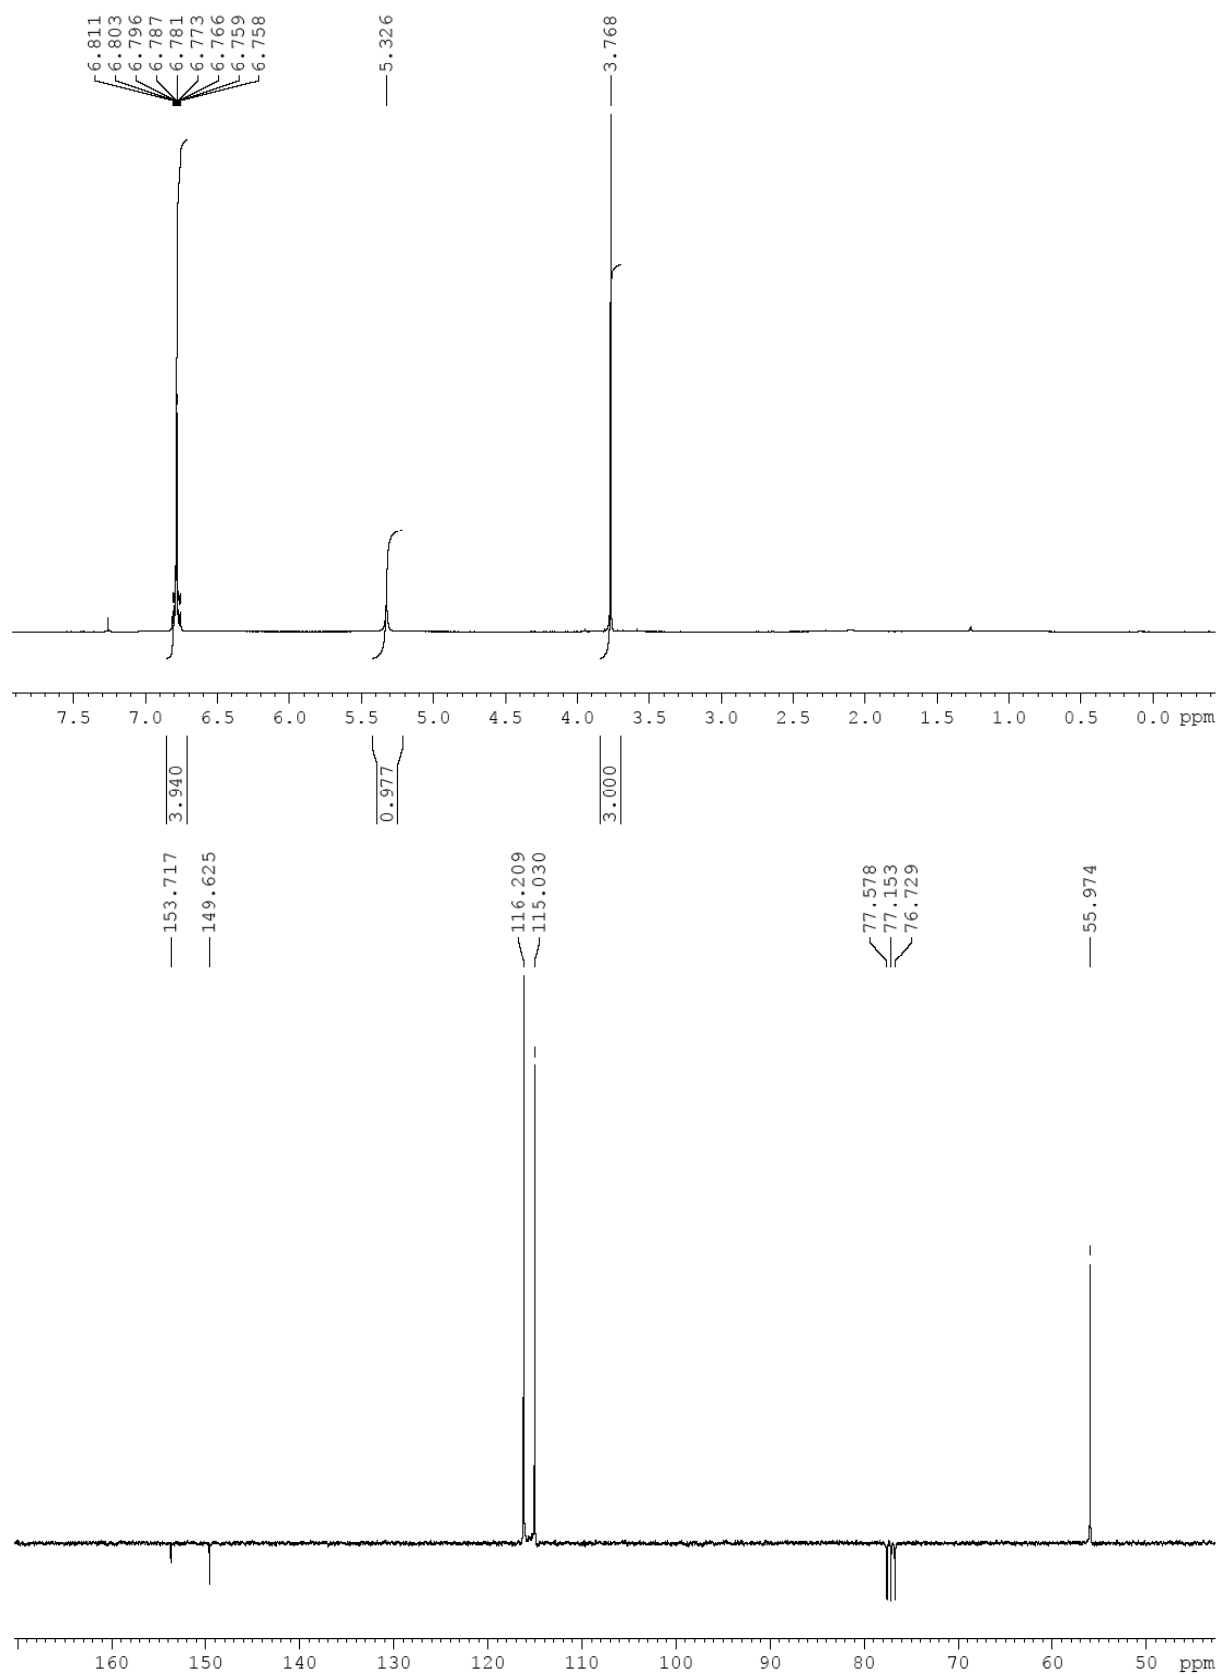

*p*-Nitrophenol (Table 2, Entry 5)<sup>2</sup>

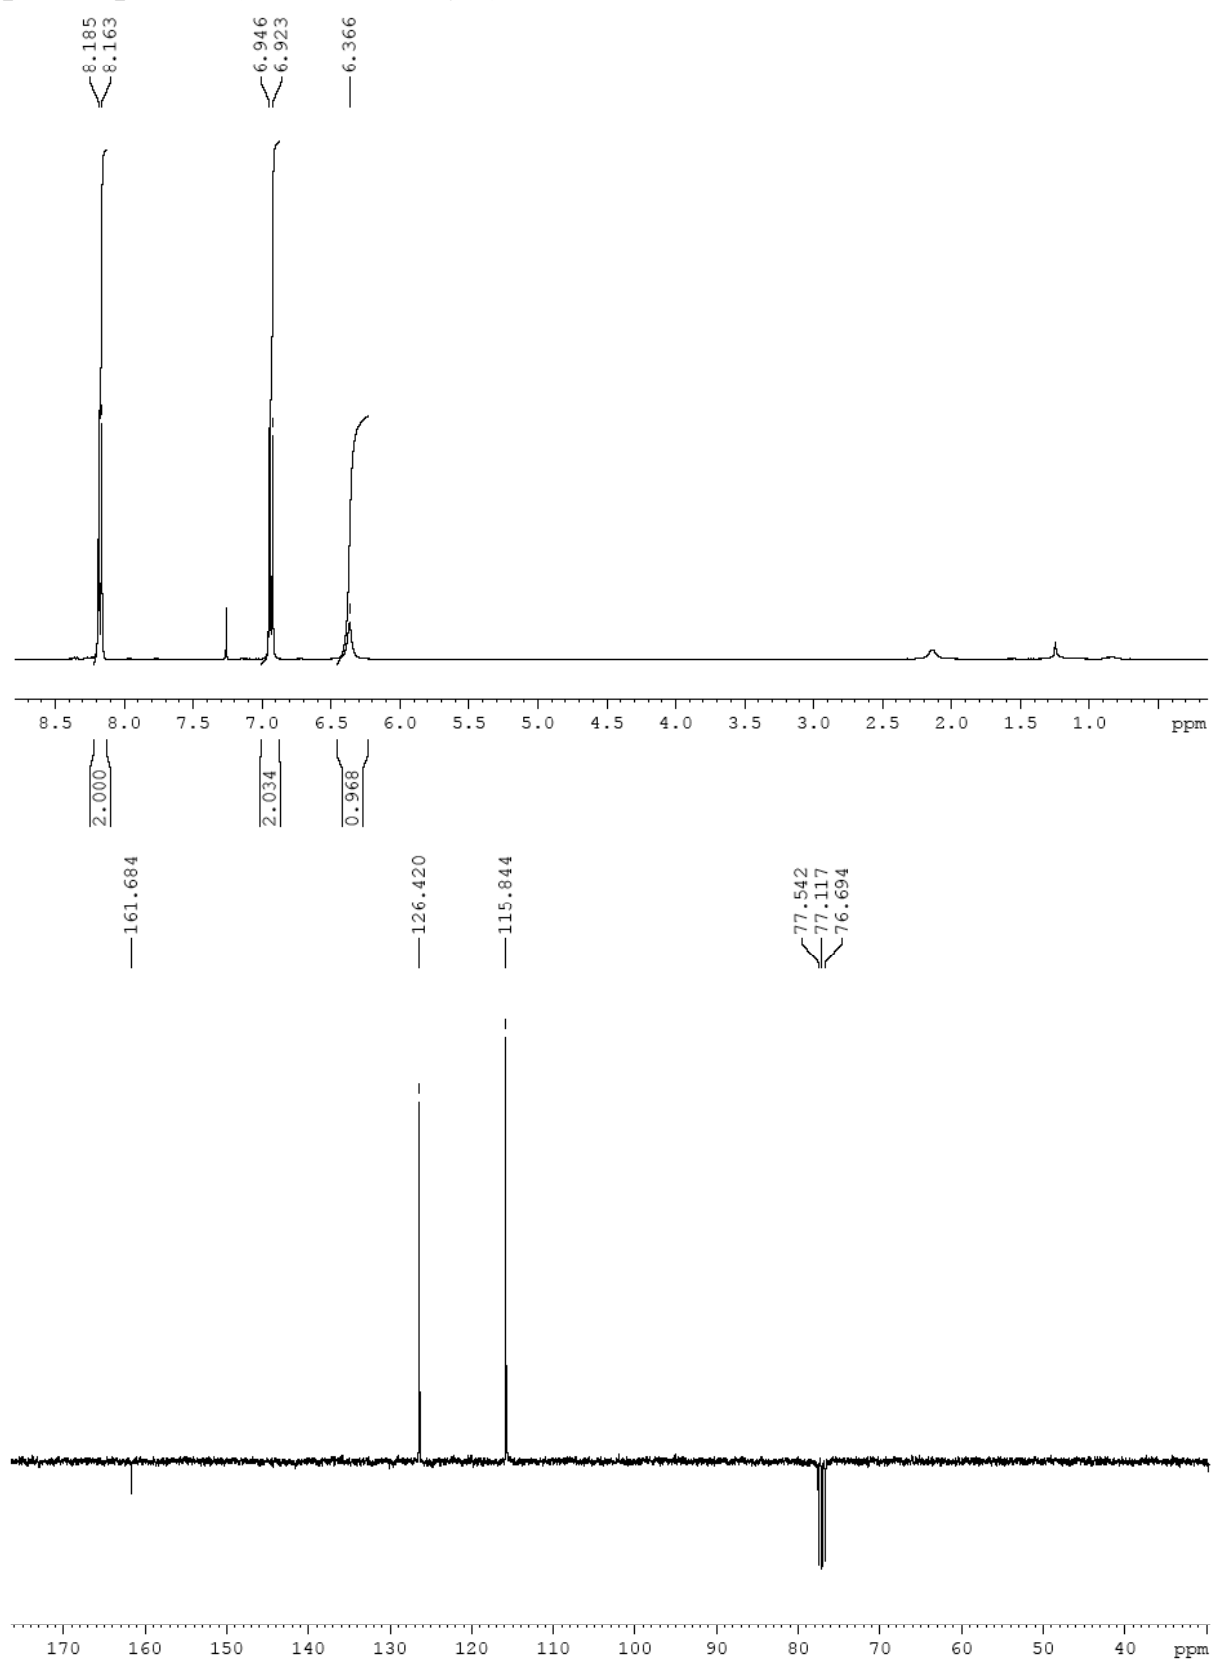

### *p*-Hydroxyacetophenone (Table 2, Entry 6)<sup>2</sup>

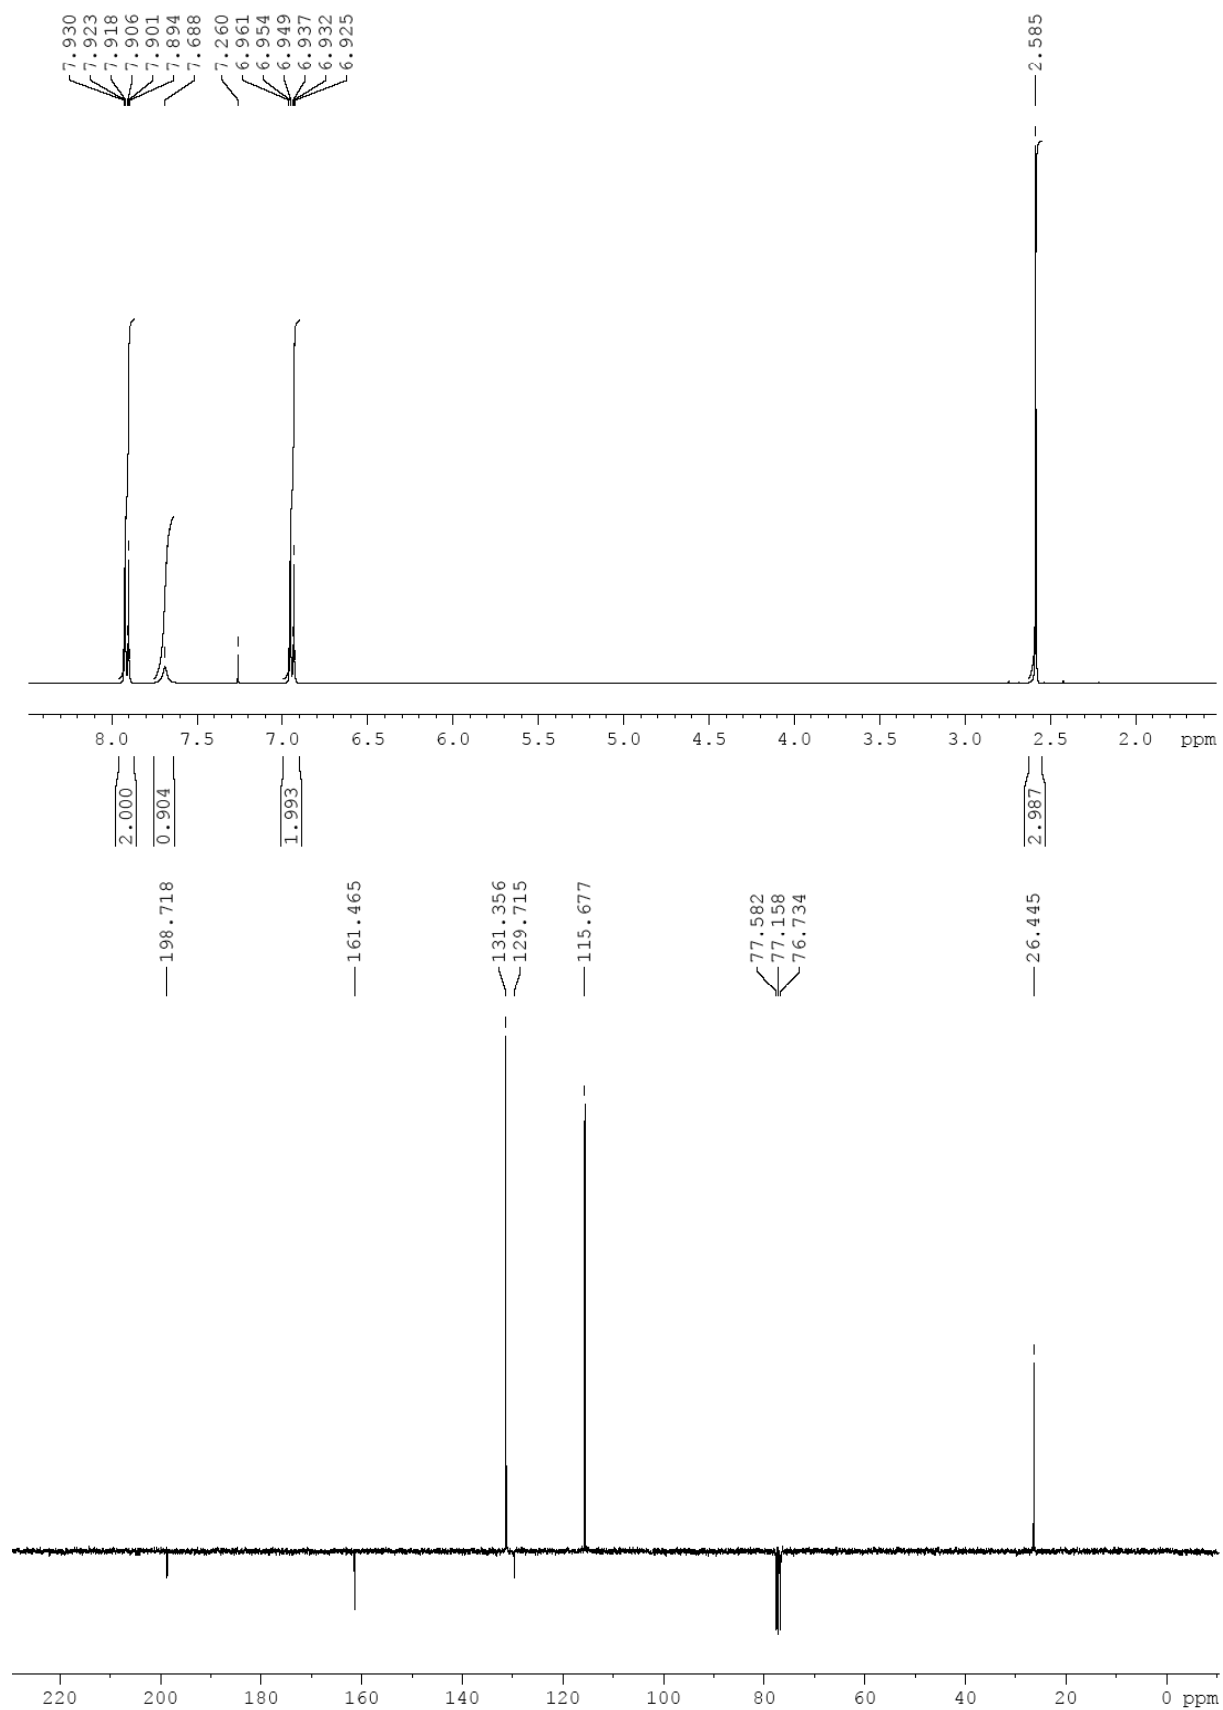

### *p*-Hydroxybenzylalcohol (Table 2, Entry 7)<sup>4</sup>

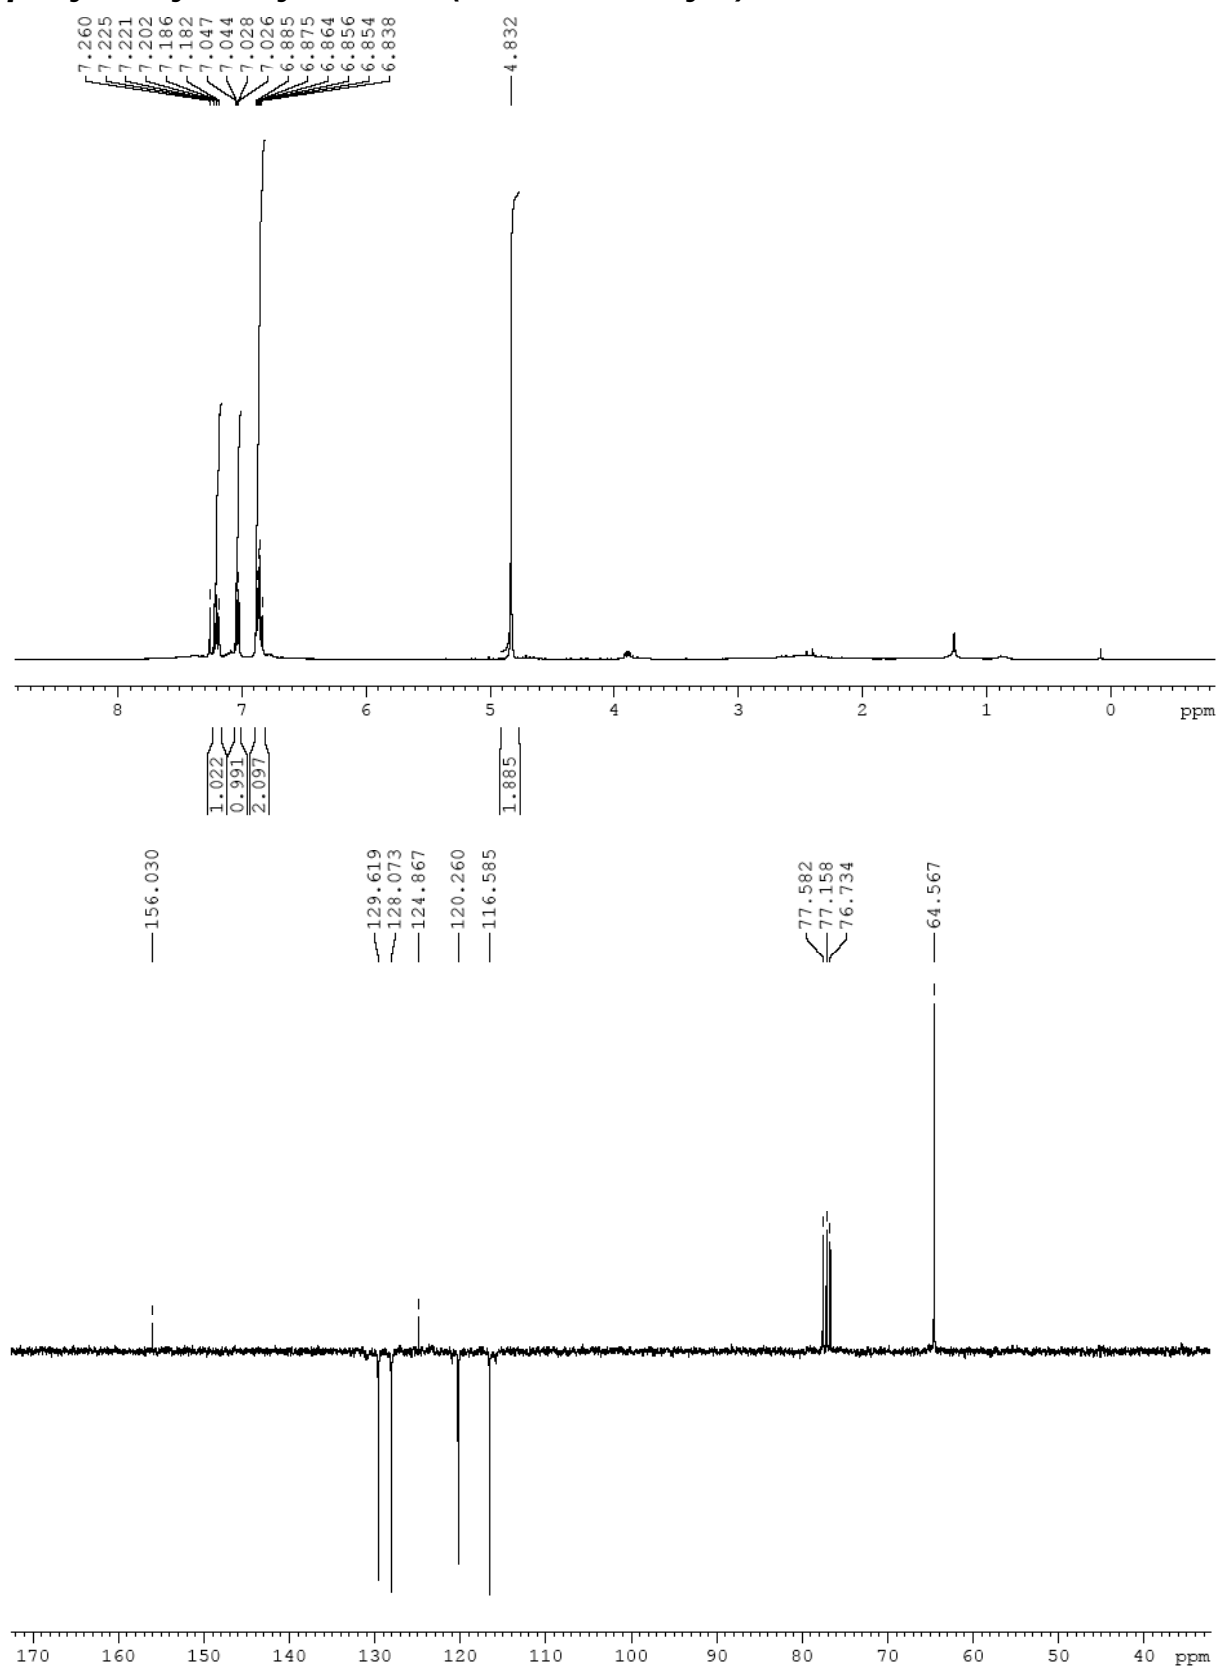

## References

1. Citadelle, C. A.; Le Nouy, E.; Bisaro, F.; Slawin, A. M. Z. and Cazin, C. S. J. *Dalton Trans.*, **2010**, 39, 4489.
2. Zhao, D.; Wu, N.; Zhang, S.; Xi, P.; Su, X.; Lan, J. and J. You, *Angew. Chem. Int. Ed.* **2009**, 48, 8729.
3. Tlili, A.; Xia, N.; Monnier, F. and Taillefer, M. *Angew. Chem., Int. Ed. Engl.* **2009**, 48, 8725.
4. NMR data were compared with Aldrich commercial compound data.
